# Supplementary material for: Textured ZnO films from evaporation-triggered aggregation of nanocrystal dispersions and their use in solar cells
Source: Royal Society of Chemistry journal article supplement (doi:10.1039/c7cp05026g), 2017-01-01
Supplement: c7cp05026g1.pdf [file c7cp05026g1.pdf]

## **Textured ZnO films from evaporation-triggered aggregation of nanocrystal dispersions and their use in solar cells**

Junfeng Yan<sup>a</sup>, Qing Lian<sup>a</sup>, Muhamad Z. Mokhtar<sup>a</sup>, Amir H. Milani<sup>a</sup>, Eric Whittaker<sup>b</sup>, Bruce Hamilton<sup>b</sup>, Paul O'Brien<sup>a,c</sup>, Nam T. Nguyen<sup>a</sup> and Brian R. Saunders<sup>a,\*</sup>

<sup>a</sup> *School of Materials, MSS Tower, The University of Manchester, Manchester, M13 9PL, U.K.*

<sup>b</sup> *Photon Science Institute, University of Manchester, Alan Turing Building, Oxford Road, Manchester, M13 9PL, U.K.*

<sup>c</sup> *School of Chemistry, The University of Manchester, Manchester, M13 9PL, U.K.*

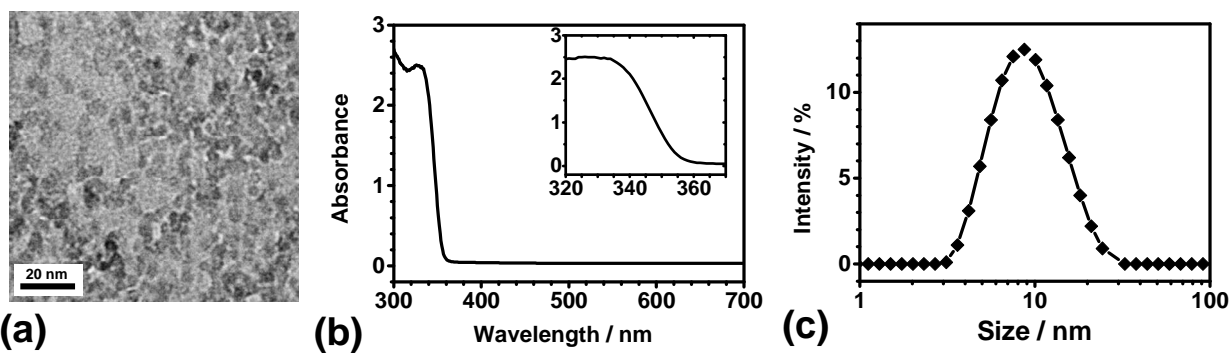

**Figure S1.** (a) Representative TEM image of ZnO nanocrystals (NCs) deposited from methanol. (b) UV-visible spectrum for ZnO dispersed in  $\text{CHCl}_3/\text{PA}$ . (Note that PA is 1-propylamine). (c) Size distribution measured for the dispersion from (b) using dynamic light scattering.

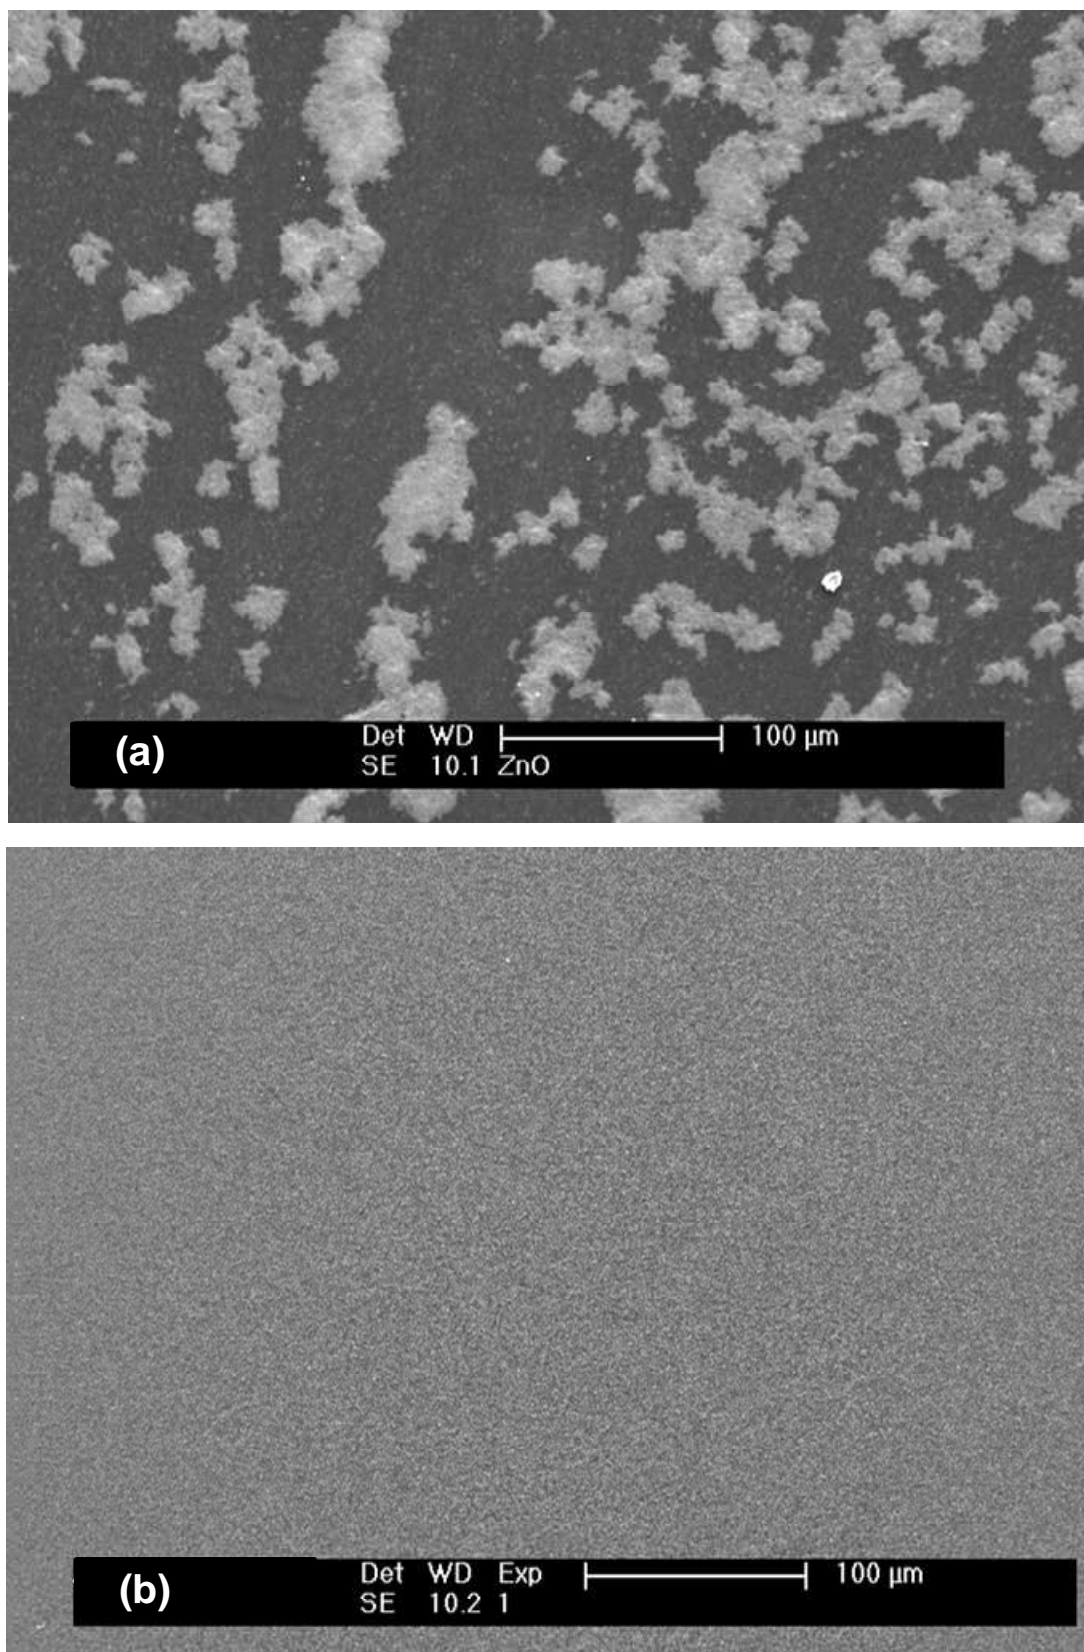

**Figure S2** Low magnification SEM images for ZnO films deposited from (a)  $\text{CHCl}_3$  and (b)  $\text{CHCl}_3/\text{PA}$ .

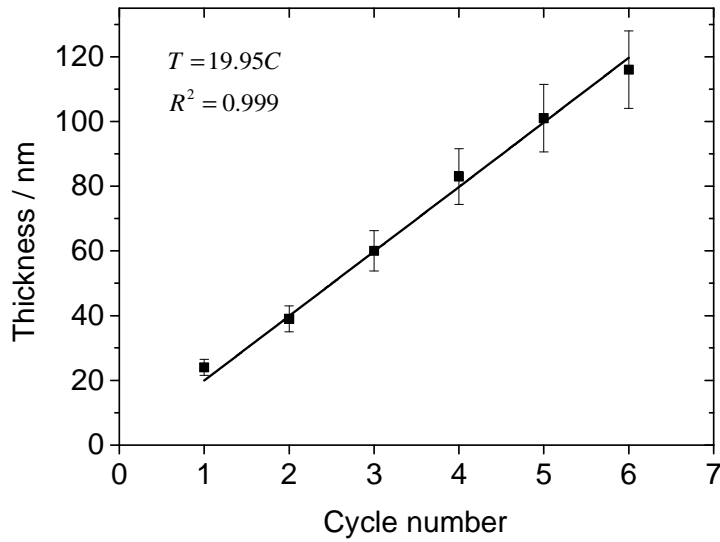

**Figure S3.** Thickness of textured porous ZnO (tp-ZnO) films as a function of deposition cycle number.

#### **Derivation of equation for estimating the volume ratio of ligand to nanocrystal**

The volume fraction occupied by the ligand in a deposited film of ligand-stabilised nanocrystals (NCs) can be estimated from the fraction of volume occupied by a collapsed ligand shell surrounding a NC ( $\phi_L$ ) assuming a spherical core-shell model. The latter can be estimated using the geometry shown in Fig. S4. This simplified treatment assumes the NCs are spherical and that all surfaces are equivalent and have a similar tendency for binding ligands and ignores specific interactions of different crystal facets for ligands. The steps required for the derivation are to first determine the volume of the NC ( $V_{NC}$ ) in terms of  $d_{NC}$ . Then, an expression is required for the volume of the ligand ( $V_L$ ) surrounding the NC. The ratio of the two expressions ( $V_L/V_{NC}$ ) can then be used to determine  $\phi_L$ . These steps are outlined in the following.

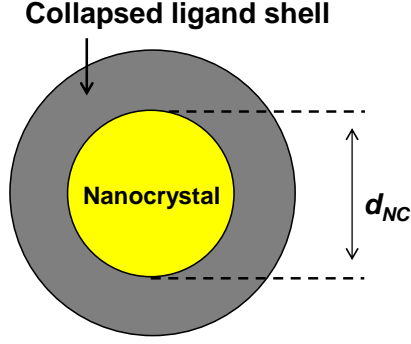

**Figure S4.** Depiction of a NC with a collapsed ligand shell.

The expression for  $V_{NC}$  is:

$$V_{NC} = \frac{\pi d_{NC}^3}{6} \quad (S1)$$

An expression for  $V_L$  requires the number of ligands bound per NC particle ( $n_{L,P}$ ) as well as the volume of a ligand molecule in the collapsed state ( $v_L$ ), i.e.,  $V_L = n_{L,P} v_L$ . An expression for  $v_L$  follows from the ligand molecular weight ( $M_L$ ) and density ( $\rho_L$ ).

$$v_L = \frac{M_L}{\rho_L N_A} \quad (S2)$$

For the above equation,  $N_A$  is Avogadro's number. A value for  $n_{L,P}$  can be estimated using the ligand surface concentration in the dispersed state ( $\Gamma_L$ ) using  $n_{L,P} = \pi d_{NC}^2 \Gamma_L$ . It follows from the above that:

$$\frac{V_L}{V_{NC}} = \frac{6\Gamma_L M_L}{d_{NC} N_A \rho_L} \quad (S3)$$

Use of  $\phi_L = (V_L / (V_L + V_{NC}))$  gives the following equation:

$$\phi_L = \frac{1}{1 + \frac{1}{(V_L/V_{NC})}} \quad (S4)$$

Equations S3 and S4 were used to calculate the values for  $V_L/V_{NC}$  and  $\phi_L$  shown in Table S1. The value used for  $\Gamma_L$  was  $22 \text{ \AA}^2$ , which is a value obtained for a monovalent ligand on NCs with a similar diameter to those studied here<sup>1</sup>.

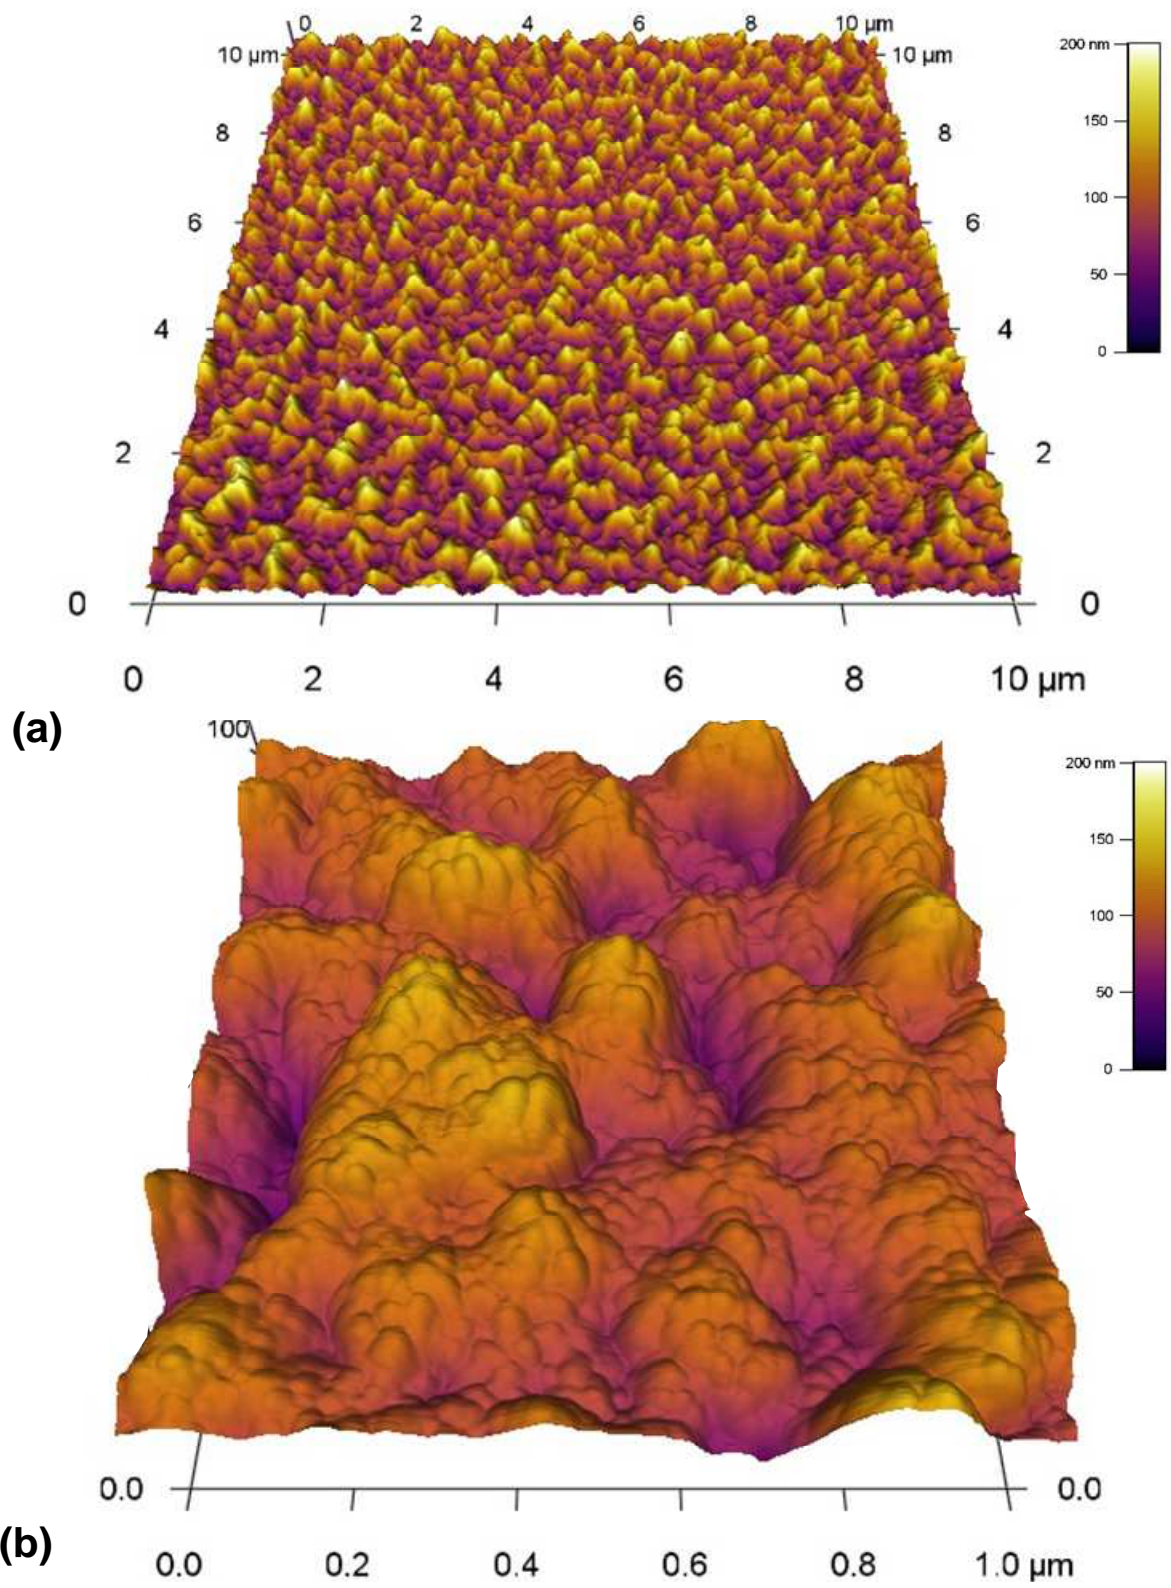

**Figure S5.** (a) and (b) show 3D AFM images for the tp-ZnO films from Fig. 1d and f, respectively.

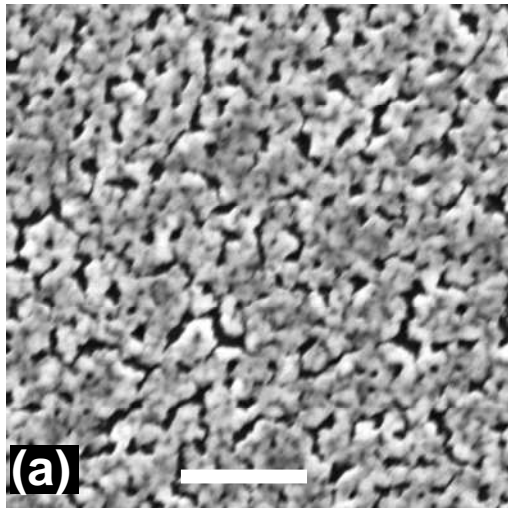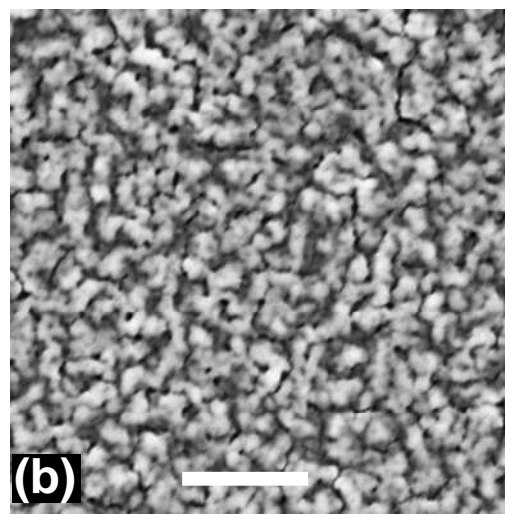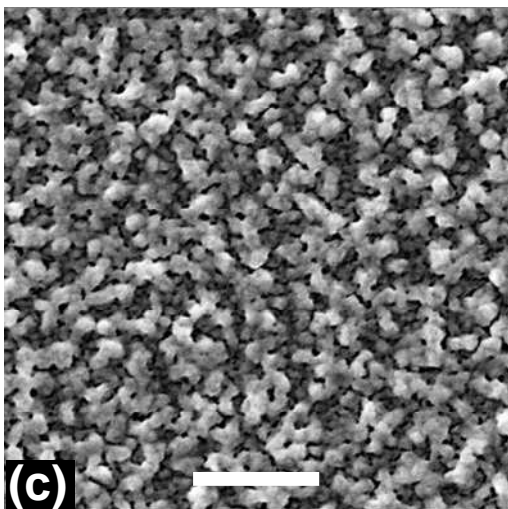

**Figure S6.** SEM images for as-prepared (a) 1 layer, (b) 3 layer and (c) 6 layer tp-ZnO films. The scale bar is 2  $\mu\text{m}$ .

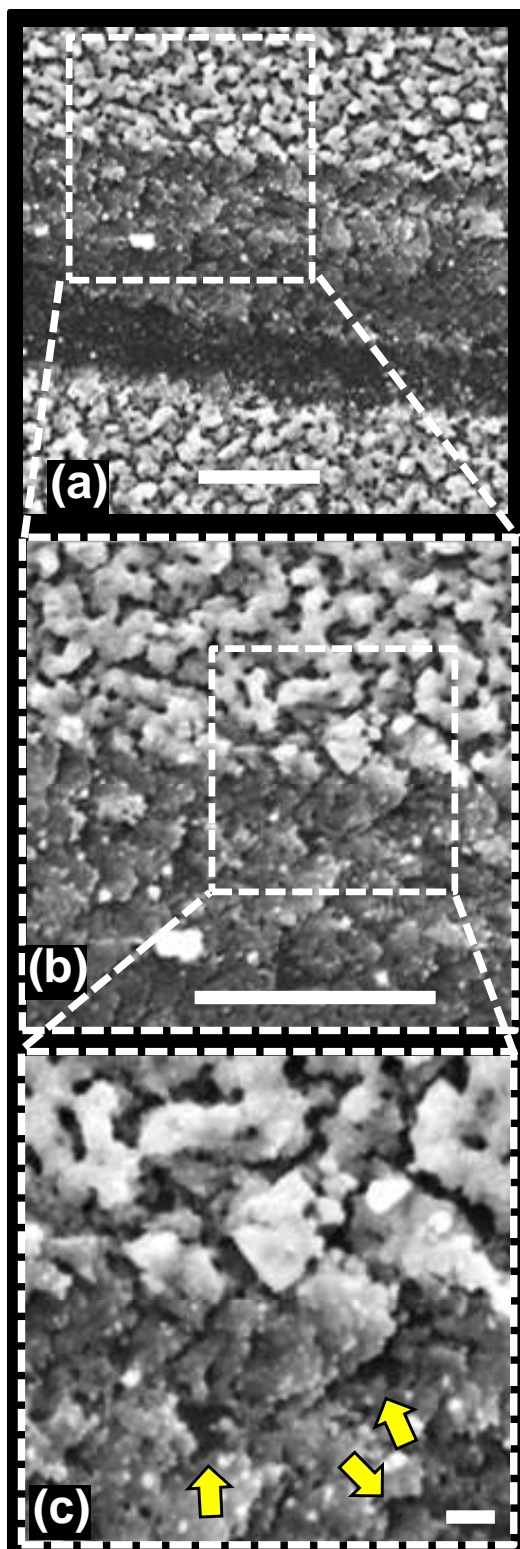

**Figure S7.** SEM images of a tp-ZnO film after it had been scratched. Shear removed the upper layers of the film and smaller pores are evident in the lower layers of the film (arrows). Scale bars: (a) and (b): 2  $\mu\text{m}$ ; (c) 200 nm.



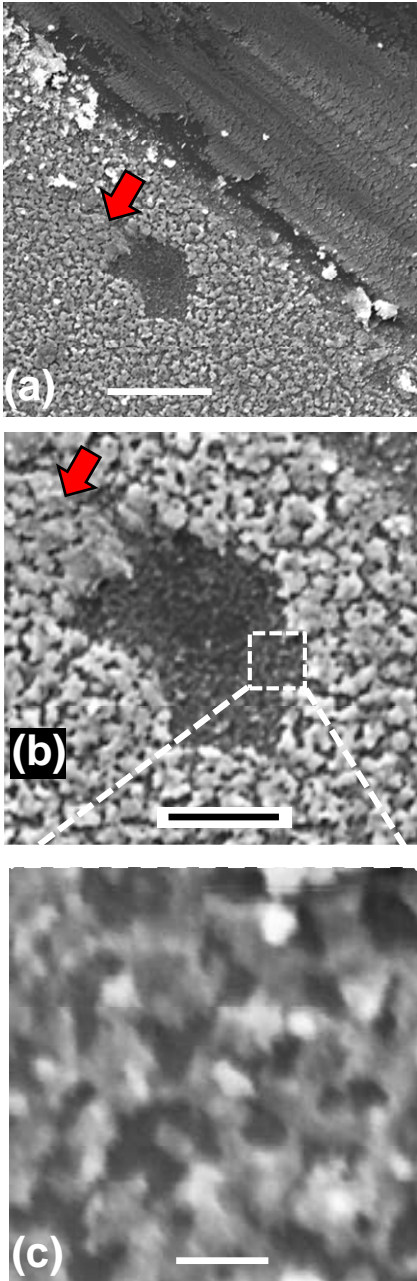

**Figure S8.** SEM images showing a region near a scratch. The red arrows in (a) and (b) show that the nearby region had been sheared which deformed the surface aggregates. This resulted in the fortuitous removal of a surface layer which revealed the sub-surface layer, which was porous. Scale bars: (a) 5  $\mu\text{m}$ ; (b) 2  $\mu\text{m}$ ; (c) 200 nm.

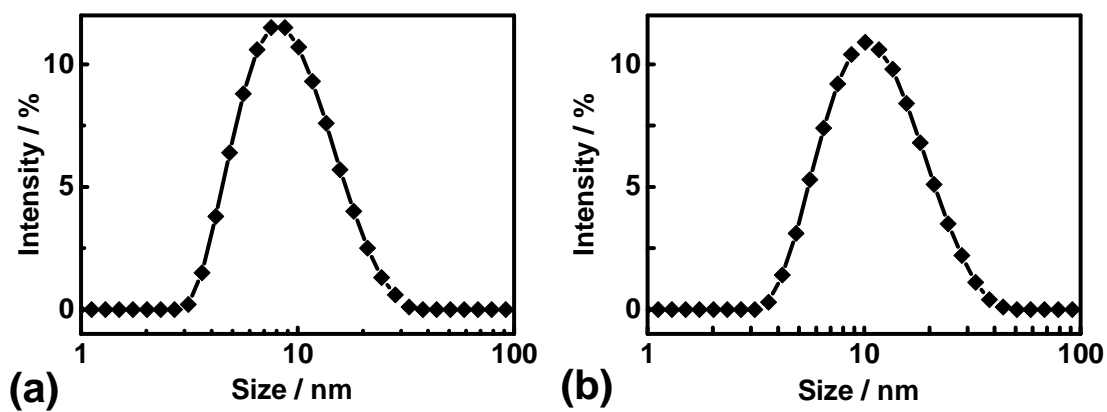

**Figure S9** DLS data for ZnO NCs dispersed in (a)  $\text{CHCl}_3/\text{BA}$  or (b)  $\text{CHCl}_3/\text{DA}$  solutions. BA and DA are *n*-butylamine and *n*-dodecylamine, respectively.

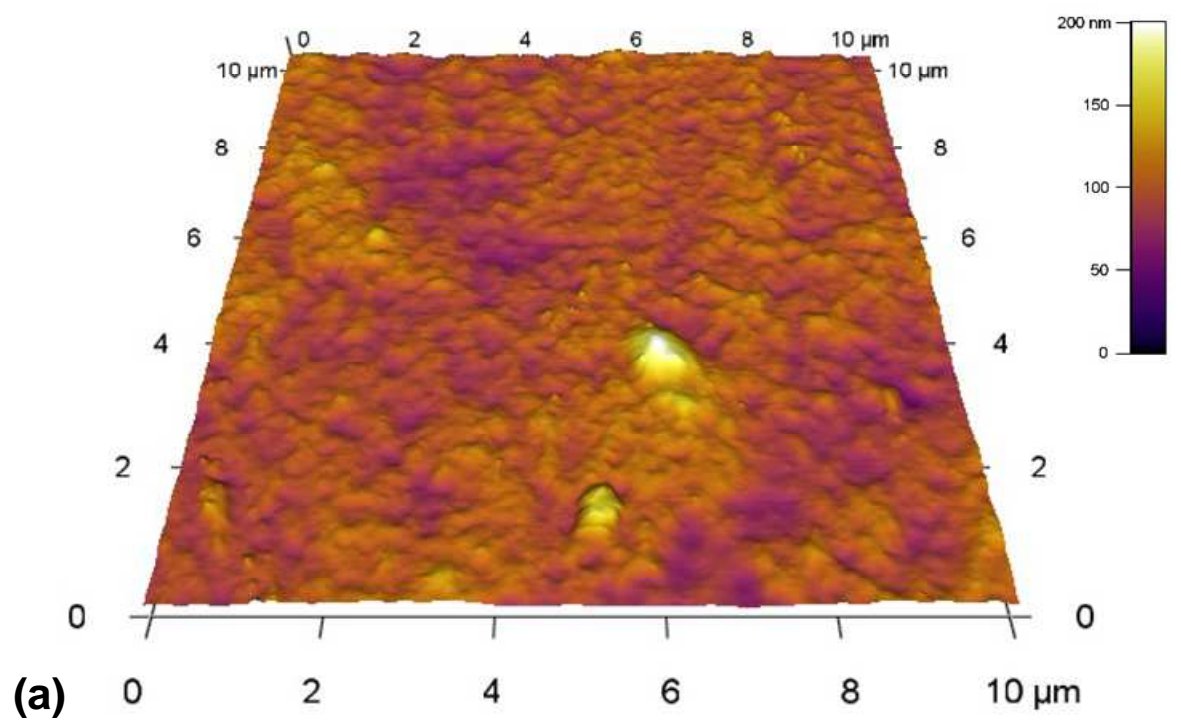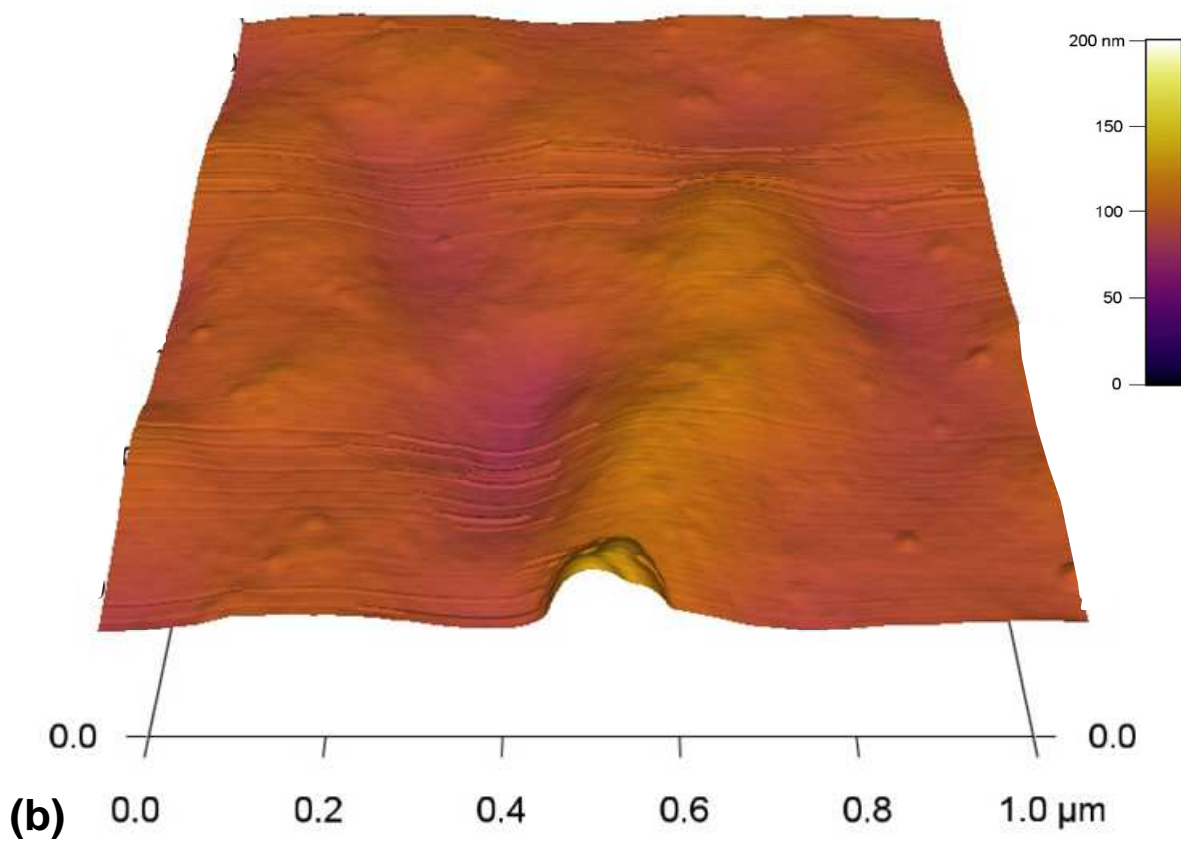

**Figure S10** (a) 3D AFM image for the ZnO/P3HT film prepared using 15 mg/mL P3HT. (b) shows a higher magnification image of the film ( $1.0 \times 1.0 \mu\text{m}^2$ ).

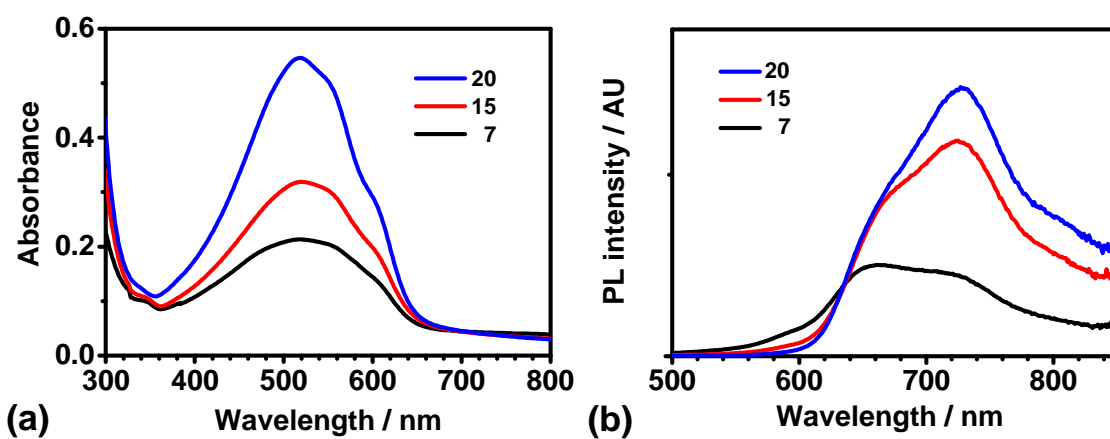

**Figure S11.** (a) UV-visible spectra (b) photoluminescence (PL) spectra for tp-ZnO/P3HT films prepared using P3HT concentrations of 7, 15 and 20 mg/mL (legends). The excitation wavelength used for (b) was 430 nm.

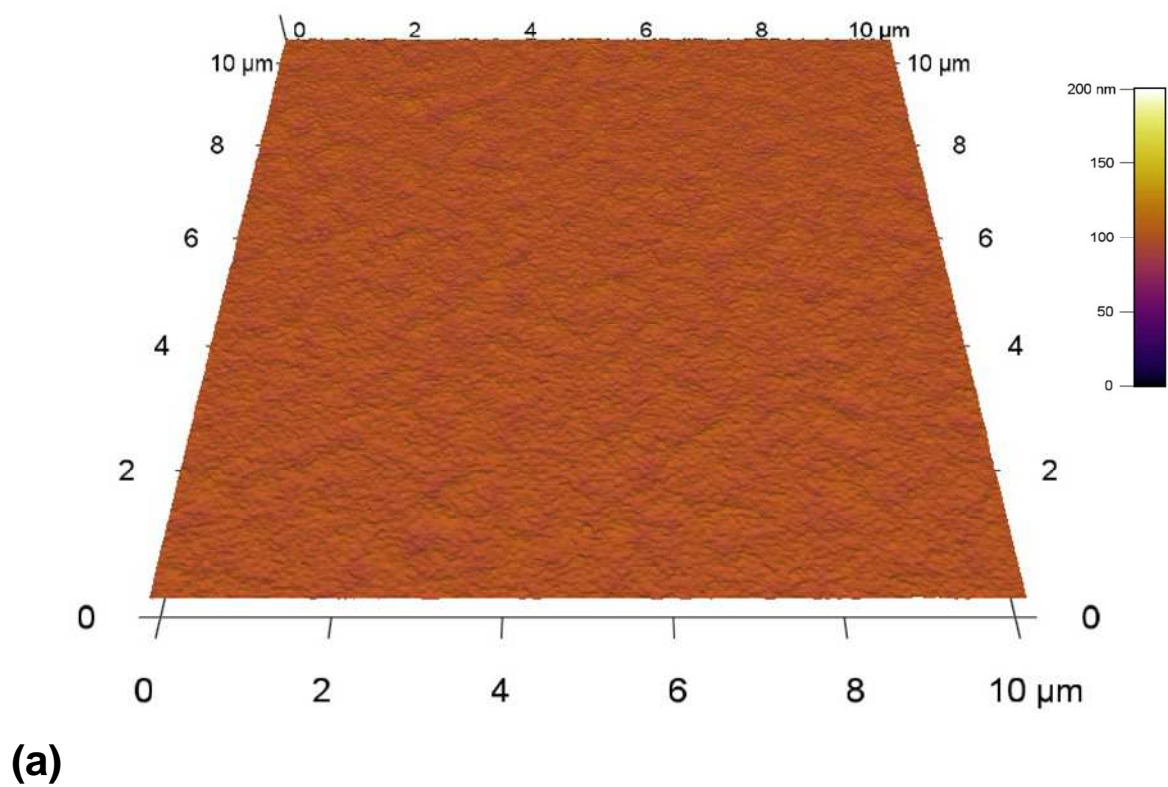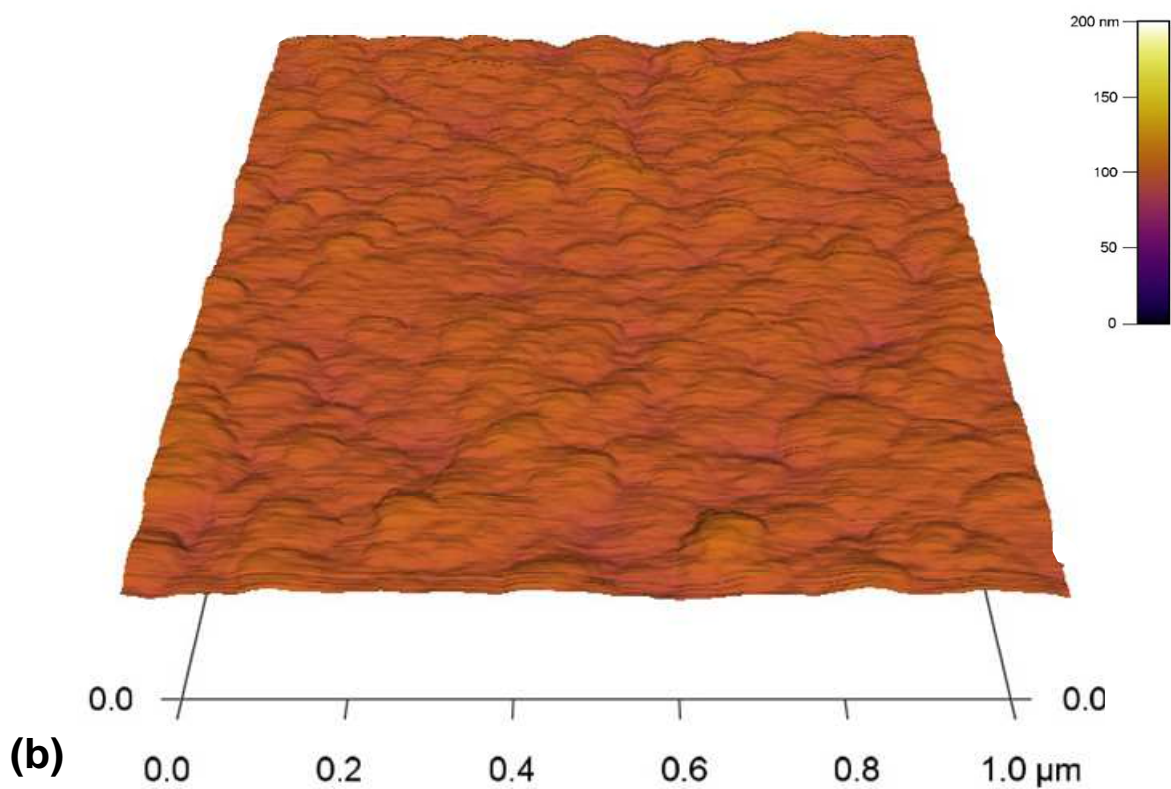

**Figure S12.** (a) 3D AFM image for the ZnO sol-gel film used to construct control devices (Fig. 6). (b) shows a higher magnification image of the film ( $1.0 \times 1.0 \mu\text{m}^2$ ).

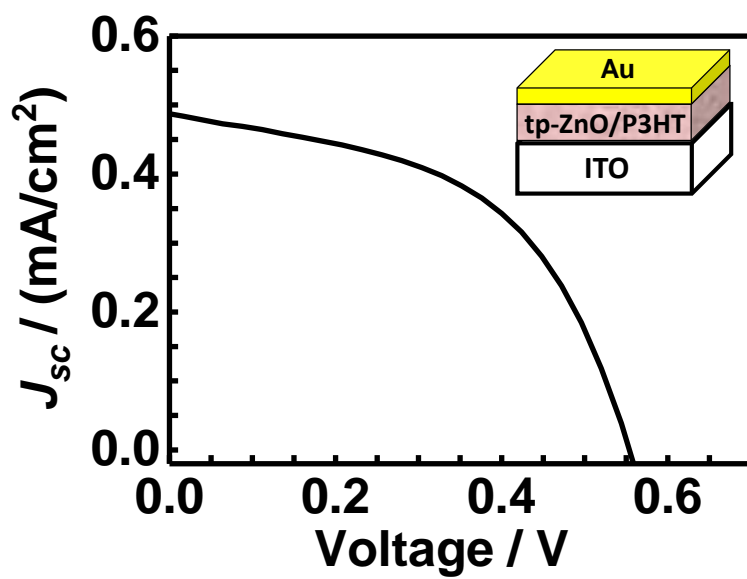

**Figure S13.** Representative  $J$ - $V$  data for an ITO/tp-ZnO/P3HT/Au device. The device geometry is shown.

## TABLES

**Table S1.** Ligand and ligand-stabilised ZnO nanocrystal properties

| Ligand | $M_L^a$ / g/mol | $\rho_L^b$ / g/ml | $V_L / V_{NC}^c$ | $\phi_L^d$ / vol.% |
|--------|-----------------|-------------------|------------------|--------------------|
| PA     | 59              | 0.72              | 0.92             | 48                 |
| BA     | 73              | 0.74              | 1.11             | 53                 |
| DA     | 185             | 0.81              | 2.57             | 72                 |

<sup>a</sup> Molecular weight of ligand. <sup>b</sup> Density from provided by supplier. <sup>c</sup> Ratio of volume of ligand to nanocrystal. <sup>d</sup> Calculated volume fraction of ligand within the ZnO NCs containing adsorbed ligand.

**Table S2.** Performance data for the tp-ZnO/P3HT solar cells.

| $C_{P3HT}$ / (mg/mL) | $J_{sc}$ / (mA/cm <sup>2</sup> ) | $V_{oc}$ / V | FF          | PCE / %       |
|----------------------|----------------------------------|--------------|-------------|---------------|
| 7 <sup>a</sup>       | 0.33 ± 0.09                      | 0.34 ± 0.06  | 0.37 ± 0.01 | 0.044 ± 0.009 |
| 15 <sup>a</sup>      | 0.46 ± 0.07                      | 0.41 ± 0.03  | 0.39 ± 0.01 | 0.078 ± 0.010 |
| 20 <sup>a</sup>      | 0.34 ± 0.02                      | 0.59 ± 0.02  | 0.51 ± 0.05 | 0.107 ± 0.012 |
| 20 <sup>b</sup>      | 0.52 ± 0.02                      | 0.55 ± 0.03  | 0.51 ± 0.03 | 0.146 ± 0.017 |
| 20 <sup>c</sup>      | 0.24 ± 0.03                      | 0.29 ± 0.03  | 0.47 ± 0.05 | 0.033 ± 0.007 |

<sup>a</sup> ITO/bl-ZnO/tp-ZnO/P3HT/Ag, <sup>b</sup> ITO/tp-ZnO/P3HT/Au and <sup>c</sup> ITO/bl-ZnO/P3HT/Ag.

## Reference

1. U. K. Gautam, M. Rajamathi, F. Meldrum, P. Morgan, and R. Seshadri. *Chem. Commun.* 2001, 629-630.
